1 **Title**

2 Spatial metabolomics identifies localized chemical changes in heart tissue during chronic cardiac  
3 Chagas disease

4 **Short Title**

5 Spatial metabolomics of chronic cardiac Chagas Disease

6 **Authors and Affiliations**

7 Danya A. Dean<sup>1,2¶</sup>, Gautham<sup>2,3¶</sup>, Jair L. Siqueira-Neto<sup>4</sup>, James H. McKerrow<sup>4</sup>, Pieter C.

8 Dorrestein<sup>4,5,6</sup>, Laura-Isobel McCall<sup>1,2,7\*</sup>

9 <sup>1</sup>Department of Chemistry and Biochemistry, University of Oklahoma, Norman, Oklahoma,  
10 United States of America

11 <sup>2</sup>Laboratories of Molecular Anthropology and Microbiome Research, University of Oklahoma,  
12 Norman, Oklahoma, United States of America

13 <sup>3</sup>Department of Biology, University of Oklahoma, Norman, Oklahoma, United States of America

14 <sup>4</sup>Skaggs School of Pharmacy and Pharmaceutical Sciences, University of California San Diego,  
15 La Jolla, California, United States of America

16 <sup>5</sup>Center for Microbiome Innovation, University of California San Diego, La Jolla, California,  
17 United States of America.

18 <sup>6</sup>Collaborative Mass Spectrometry Innovation Center, University of California San Diego, La  
19 Jolla, California, United States of America

20 <sup>7</sup>Department of Microbiology and Plant Biology, University of Oklahoma, Norman, Oklahoma,  
21 United States of America

22

23 \* Corresponding author

24 E-mail: [lmccall@ou.edu](mailto:lmccall@ou.edu)

25 ¶These authors contributed equally to this work

26

## 27 **Abstract**

28 Chagas disease (CD) is one of thirteen neglected tropical diseases caused by the parasite  
29 *Trypanosoma cruzi*. CD is a vector-borne disease transmitted by triatomines but CD can also be  
30 transmitted through blood transfusions, organ transplants and congenital transmission. While  
31 endemic to Latin America, *T. cruzi* infects 7-8 million people worldwide and can induce severe  
32 cardiac symptoms including apical aneurysms, thromboembolisms and arrhythmias during the  
33 chronic stage of CD. However, these cardiac clinical manifestations and CD disease  
34 pathogenesis are not fully understood. Using spatial metabolomics (chemical cartography), we  
35 sought to understand the localized impact of infection on the cardiac metabolome of mice  
36 chronically infected with two divergent *T. cruzi* strains. Our data showed chemical differences in  
37 localized cardiac regions upon chronic *T. cruzi* infection, indicating that parasite infection  
38 changes the host metabolome at select sites in chronic CD. These sites were distinct from the  
39 sites of highest parasite burden. In addition, we identified acylcarnitines and phosphocholines as  
40 discriminatory chemical families within each heart region, comparing infected and uninfected  
41 samples. Overall, our study indicated overall and positional metabolic differences common to  
42 infection with different *T. cruzi* strains, and identified select infection-modulated pathways.  
43 These results provide further insight into CD pathogenesis and demonstrate the advantage of a  
44 spatial perspective to understand infectious disease tropism.

## 45 **Author Summary**

46 Chagas disease (CD) is a tropical disease caused by the parasite *Trypanosoma cruzi*. CD  
47 originated in South America; however, there are now 7-8 million people infected worldwide due  
48 to population movements. CD is transmitted through a triatomine vector, organ transplants,  
49 blood transfusions and congenital transmission. It occurs in two stages, an acute stage (usually  
50 asymptomatic) and the chronic stage. Chronic stage CD presents with severe cardiac symptoms  
51 such as heart failure, localized aneurysms and cardiomyopathy. Unfortunately, what causes  
52 severe cardiac symptoms in some individuals in chronic CD is not fully understood. Therefore,  
53 we used liquid chromatography-tandem mass spectrometry to analyze the heart tissue of  
54 chronically *T. cruzi*-infected and uninfected mice, to understand the impact of infection on the  
55 tissue metabolome. We identified discriminatory small molecules related to *T. cruzi* infection.  
56 We also determined that regions with the highest parasite burden are distinct from the regions  
57 with the largest changes in overall metabolite profile; these locations of high metabolic  
58 perturbation provide a molecular mechanism to why localized cardiac symptoms occur in CD.  
59 Overall, our work gives insight to chronic cardiac CD symptom development and shapes a  
60 framework for novel treatment and biomarker development.

## 61 **Introduction**

62 Chagas disease (CD) is a parasitic disease caused by the protozoan *Trypanosoma cruzi*  
63 and is one of the designated “neglected tropical diseases” [1]. *T. cruzi* is endemic to Latin  
64 America and infects 7-8 million people worldwide [1]. An estimated 300,000 infections have  
65 been recorded in the United States due to a large Latin American immigrant population and  
66 endemic transmission [2–4]. CD is primarily transmitted through triatomine insects of the  
67 *Triatoma* and *Rhodnius* genera [2]. Non-vectorial modes of transmission involve blood  
68 transfusion, transplacental transmission, and food and drink contaminated with *T. cruzi* [1]. The  
69 *T. cruzi* life cycle includes three main stages: epimastigotes, trypomastigotes and amastigotes. *T.*  
70 *cruzi* in the insect vector undergoes transformation from trypomastigotes to epimastigotes in the  
71 midgut, and then migrates to the hindgut and differentiates into infective trypomastigotes [1].  
72 Upon triatomine defecation on the human host, the infective trypomastigotes enter the host  
73 through scratching or rubbing of the bite wound, or through eyes and mucosal surfaces [1].  
74 Following mammalian host cell infection, trypomastigotes differentiate into amastigotes, which  
75 proliferate and subsequently transform into trypomastigotes [1]. CD has two disease stages:  
76 acute and chronic [1,2]. The acute stage is usually asymptomatic, or presents with non-specific  
77 symptoms (fever, malaise) [1,2]. 20-30% of infected individuals will then progressively develop  
78 clinical manifestations of chronic CD, including cardiomegaly, cardiac arrhythmias, apical  
79 aneurysms, megacolon, and megaesophagus [2]. *T. cruzi* infections are treated with either  
80 benznidazole or nifurtimox; however, these treatments cause significant adverse effects to the  
81 point that up to 30% of treated individuals fail to complete the full treatment course [5,6].

82 CD was previously considered to have an autoimmune etiology, but parasite persistence  
83 has now conclusively been demonstrated to be required for disease pathogenesis [7]. Along with

84 parasite persistence, chronic pro-inflammatory responses, including cytokine release and CD8+  
85 T cell- mediated cytotoxicity, contribute to tissue damage [8]. A heterogeneity of interacting  
86 parasite-host factors, including *T. cruzi* strain, load and tissue tropism, host genetic background,  
87 and mode of infection, influence the clinical outcomes of the disease [9,10]. However, CD  
88 disease pathogenesis is not yet completely understood [2]. A holistic understanding of the  
89 molecular pathways involved in disease progression could help identify new drug development  
90 avenues and outcome-predictive biomarkers.

91         Metabolites are the final products of mRNA and protein expression and protein activity,  
92 thus providing information closely linked to phenotype [11]. Metabolic pathways are druggable.  
93 They also change dynamically in response to disease [12,13]. As such, an improved  
94 understanding of metabolism in CD may lead to new avenues for drug development and CD  
95 patient monitoring. Acute *T. cruzi*-infection affects *in vitro* and *in vivo* host metabolic pathways,  
96 including decreasing mitochondrial oxidative phosphorylation-mediated ATP production [8,14–  
97 16]. In addition, acute *T. cruzi*-infected mice heart tissue and plasma showed significant up- or  
98 down-regulation of certain metabolic pathways, such as glucose metabolism (glucose levels  
99 elevated in heart tissue and lowered in plasma over time), tricarboxylic acid cycle (TCA)  
100 (decrease in select TCA metabolites in the heart tissue and a decrease in all TCA metabolites in  
101 plasma), lipid metabolism (increased long-chain fatty acids in the heart tissue and the opposite in  
102 plasma), and phospholipid metabolism (high accumulation of phosphocholine precursor  
103 metabolites in the heart in comparison to plasma) [14]. Prior analysis of hearts from acutely-  
104 infected mice also showed that cardiac metabolite profiles reflected disease severity, with  
105 changes in cardiac acylcarnitines and phosphatidylcholines predictive of acute infection outcome  
106 [8]. Metabolomic analysis of chronic CD has been limited to serum and gastrointestinal tract

107 samples [17][18]. Serum analysis demonstrated significant changes in amino acid and lipid  
108 metabolism, particularly acylcarnitines, sphingolipids, and glycerophospholipids [17]. Analysis  
109 of GI tract samples observed persistent metabolic perturbations in the oesophagus and large  
110 intestine in chronic CD, including infection-induced elevation of acylcarnitines,  
111 phosphatidylcholines and amino acid derivatives [18]. However, metabolic changes in the heart  
112 may differ from those in the circulation or in the GI tract [14]. It is therefore essential to perform  
113 metabolomic analysis of tissues collected from the heart in chronic CD. Many sudden fatalities  
114 due to chronic cardiac CD are often attributed to apical aneurysms which occur at the bottom of  
115 the heart [19,20]. We therefore focused on liquid chromatography-tandem mass spectrometry-  
116 based metabolomic analysis of horizontally-sectioned hearts from mice chronically infected with  
117 *T. cruzi* strains CL and Sylvio X10/4. These samples had previously been analyzed in terms of  
118 positional differences (heart apex vs heart base), but not in the context of metabolic changes  
119 associated with chronic *T. cruzi* infection [8]. Overall, we observed significant localized  
120 chemical differences associated with infection, with a disconnect between parasite localization  
121 and overall positional metabolic perturbations. Our data also showed infection-induced  
122 variations in acylcarnitine and phosphocholine chemical families.

123

## 124 **Methods**

### 125 **Ethics statement**

126 All vertebrate animal studies were performed in accordance with the USDA Animal  
127 Welfare Act and the Guide for the Care and Use of Laboratory Animals of the National Institutes  
128 of Health. The protocol was approved by the University of California San Diego Institutional  
129 Animal Care and Use Committee (protocol S14187).

130 ***In vivo* experimentation**

131 All *in vivo* experimentation, sample collection and qPCR analysis was conducted and  
132 previously reported in [8].

133 **Metabolite extraction and UHPLC-MS/MS**

134 The two-step procedure for metabolite extraction was adapted from Want *et al* [21] and  
135 was conducted in McCall *et al* [8], with “aqueous” and “organic” extracts referring to the  
136 metabolites recovered from the first 50% methanol extraction and the second 3:1  
137 dichloromethane-methanol extraction, respectively. UHPLC-MS/MS analysis was conducted  
138 using a Thermo Scientific UltiMate 3000 Ultra High Performance Liquid Chromatography with  
139 a C8 LC column and MS/MS detection on a Maxis Impact HD QTOF mass spectrometer (Bruker  
140 Daltonics), as previously reported [8][21].

141 **LC-MS/MS data analysis**

142 Data processing was performed as previously reported using Optimus, July 21, 2016  
143 version [8][22]. Total ion current (TIC) normalization was performed in R studio. Principal  
144 coordinate analysis (PCoA) was performed on total ion current (TIC) normalized MS1 feature  
145 data table using the Bray-Curtis-Faith dissimilarity metric using QIIME1 [23], for both organic  
146 and aqueous extractions combined. The three-dimensional PCoA plots were visualized in  
147 EMPeror [24]. Heart three-dimensional modelling was completed using ‘ili’ (<http://ili.embl.de/>)  
148 [25] using a three dimensional heart model from 3DCADBrower.com  
149 (<http://www.3dcadbrower.com/>).

150 Global Natural Products Social Molecular Networking (GNPS) was used to perform  
151 molecular networking according to the parameters in Table 1 [26]. Cytoscape 3.7.0. was used to  
152 visualize the molecular networks [27].

153 **Table 1: Global Natural Products Social Molecular Networking (GNPS) parameters.**

|                                   |             |
|-----------------------------------|-------------|
| Parent mass                       | 2.0 Da      |
| MS/MS fragment ion tolerance      | 0.5 Da      |
| Cosine score                      | 0.7         |
| Minimum matched fragment ions     | 6           |
| Analog search against the library | not allowed |
| Network TopK                      | 10          |
| Maximum Connected Component Size  | 100         |
| Minimum cluster size              | 2           |
| Score threshold                   | 0.7         |
| Library search Min Matched Peaks  | 6           |
| Filter precursor window           | filter      |
| Filter peaks in 50Da window       | filter      |

154

155 Random forest analysis was performed in Jupyter Notebook using R with the number of  
156 trees set to 500. Random forest classifier cutoff was based on ranked variable importance score  
157 of differential metabolites in combination with unadjusted p-values<0.05 where 4 consecutive  
158 non-significant unadjusted p-values defined the cutoff. FDR-corrected Mann Whitney p<0.05 for  
159 all positions was also used as an alternate method to determine significant metabolite differences.



160 Venn diagrams were used to visualize the unique and common metabolites differential between  
161 CL and Sylvio X10/4 infection, compared to uninfected samples, based on heart segment  
162 positions, random forest classifier for all positions, and FDR-corrected Mann Whitney  $p < 0.05$   
163 for all positions, using <http://bioinformatics.psb.ugent.be/webtools/Venn/>.

164

## 165 **Data availability**

166 Metabolomics data has been deposited in MassIVE (<http://massive.ucsd.edu/>, accession  
167 #MSV000080450). Molecular networks can be accessed at  
168 <https://gnps.ucsd.edu/ProteoSAFe/status.jsp?task=f16bc44c3d5040d098c978823f50c68f> (all  
169 samples, Aqueous extract),  
170 <https://gnps.ucsd.edu/ProteoSAFe/status.jsp?task=5f8af6d62d8549358966f3896a81063a> (all  
171 samples, Organic extract).

172

## 173 **Results**

174 The purpose of this study was to compare the metabolic impact of chronic *T. cruzi*  
175 infection in the mouse heart between divergent *T. cruzi* strains and between cardiac regions. To  
176 do so, we analyzed previously-collected positive mode LC-MS/MS data from mice chronically  
177 infected with *T. cruzi* strain CL or Sylvio X10/4 [8]. While this prior study focused on positional  
178 differences between uninfected samples and on the impact of acute infection on the cardiac  
179 metabolite profile, here we specifically focused on the impact of chronic infection on the cardiac  
180 metabolite profile.

181 We observed a clear distinction in the impact of *T. cruzi* infection on the overall  
182 metabolite profile between *T. cruzi* strains by heart position (Fig 1, S1 figure, S2 figure). As

183 previously described [8], parasite burden was highest at the base of the heart (position A) for  
184 strain CL and central positions (position C) for strain Sylvio X10/4 (Fig 1A). PERMANOVA  
185 analysis indicated that the highest significant perturbation in the overall metabolite profile  
186 occurred at central positions for strain CL infection (PERMANOVA analysis of Bray-Curtis-  
187 Faith distance matrix  $R^2=0.20813$ , p-value=0.004 at position C) and at apical positions for strain  
188 Sylvio X10/4 infection (PERMANOVA analysis Bray-Curtis-Faith distance matrix  $R^2=0.27923$ ,  
189 p-value=0.014 at position D) (Fig 1 B). Strikingly, in both cases chemical disturbance was  
190 greatest at sites distinct from the- highest parasite burden, which corroborates our observations in  
191 the context of chronic gastrointestinal *T. cruzi* infection in mice [18]. The localization of  
192 chemical disturbance also provides a molecular mechanism explaining the apical aneurysms  
193 observed in CD patients.

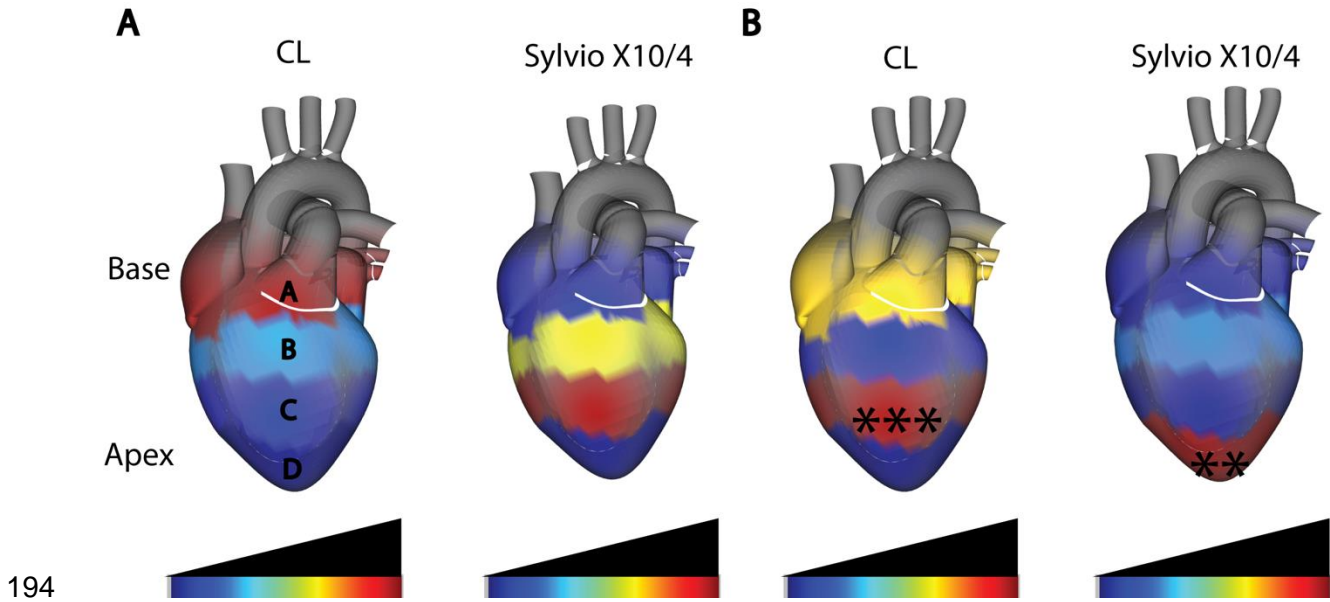

194

195 **Fig 1. Disconnect between sites of parasite persistence and metabolic alterations in chronic**  
196 **cardiac CD.**

197 (A) Median cardiac parasite burden, as determined by qPCR. Parasite burden was highest at the  
198 heart base (position A) for strain CL and central heart segments (position C) for strain Sylvio  
199 X10/4, indicating parasite strain-specific differences in parasite tropism. (B) Statistically  
200 significant perturbations in the overall metabolite profile between uninfected and strain CL-  
201 infected (left), and between uninfected and strain Sylvio X10/4-infected mice (right) were  
202 analyzed using PERMANOVA. The highest significant metabolite perturbation was at central  
203 heart segments (position C) for strain CL (\*\*\*,  $p < 0.001$  by PERMANOVA) and at the heart  
204 apex (position D) for strain Sylvio X10/4 (\*\*,  $p < 0.01$  by PERMANOVA).

205

206 To identify the specific cardiac metabolites spatially perturbed by infection, initially we  
207 built a random forest classifier for each position, each strain and each extraction method,  
208 comparing to uninfected matched control samples (S1-S6 tables). We first assessed the overlap  
209 between the top-ranked most differential metabolites by random forest for the two different

210 strains, as described in Methods. Limited overlap of these significant metabolites was observed  
211 between strains (Figure 2). However, annotation of these differential metabolites using  
212 molecular networking through the GNPS platform [26] revealed that while differing in terms of  
213  $m/z$ , many were part of the same chemical families, including acylcarnitines and phosphocholine  
214 (S1 - S6 Table; S3 and S4 figure).

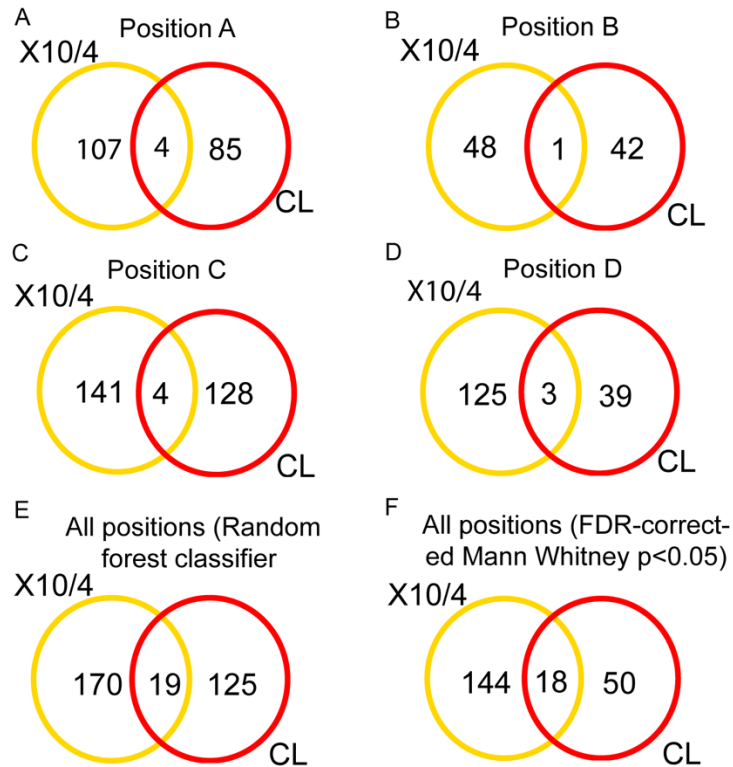

215  
216 **Fig 2. Limited overlap of specific differential metabolites between strains.**  
217 Yellow and red circles represent differential metabolites between strain Sylvio X10/4-infected  
218 and matched uninfected controls, and between strain CL-infected and matched uninfected  
219 controls, respectively. Intersect are metabolites impacted by infection in both strains. (A-D)  
220 Differential metabolites for each strain, at given heart positions. (E) Metabolites impacted by  
221 infection with each strain, irrespective of position, as determined by random forest classifier,  
222 with variable importance score cutoff as described in Methods. (F) Metabolites impacted by

223 infection with each strain, irrespective of heart position using FDR-corrected Mann Whitney  
224  $p < 0.05$  cutoff.

225

226 Random forest classifier identified several acylcarnitines and phosphocholines as  
227 impacted by infection (S1 - S5 Tables). Both chemical families play a major role in several  
228 biochemical pathways. Carnitine serves as a shuttling mechanism for fatty acids, in the form of  
229 acylcarnitines, from the cytosol into the matrix of the mitochondria for beta-oxidation [28].  
230 Phosphocholines are major components of lipid metabolism, cell membrane structure, and  
231 choline production, the latter of which is essential for select amino acid and neurotransmitter  
232 synthesis [29,30].

233 Total acylcarnitines in central positions of the heart were decreased by strain Sylvio  
234 X10/4 infection compared to the uninfected group (Fig 3 A and B, Mann-Whitney  $p < 0.05$ ). A  
235 similar trend was observed for total acylcarnitines following strain CL infection when compared  
236 to matched uninfected samples, even though this difference was not statistically significant (Fig  
237 3A and B). Previous studies demonstrated that acylcarnitines of different lengths were associated  
238 with infection outcome in acute *T. cruzi* mouse models [8]. Therefore, we sought to understand  
239 how different length acylcarnitines were affected by chronic infection. Acylcarnitines are  
240 classified based on the number of carbons in their fatty acid chain as short- ( $\leq C4$ ), mid- ( $C5 -$   
241  $C11$ ), and long-chain ( $\geq C12$ ) acylcarnitines.

242 Central and apical positions (positions B, C and D) had the largest abundance of mid and  
243 long chain acylcarnitines in both CL and Sylvio X10/4 strain compared to the heart base (Mann  
244 Whitney  $p < 0.05$ ) (Fig 3 C-H). In the case of CL strain infection, when compared to uninfected  
245 samples, short chain acylcarnitines were significantly decreased at the heart base and apex  
246 (positions A and D,  $p < 0.05$  Mann-Whitney)(Fig 3 C and D). Mid-chain acylcarnitine levels

247 were decreased by strain CL infection compared to uninfected samples at central positions  
248 (position B,  $p < 0.05$  Mann-Whitney) (Fig E and F). In contrast, long chain acylcarnitines were  
249 significantly increased at central and apical positions (positions C and D respectively) by strain  
250 CL infection (Mann-Whitney  $p < 0.05$ ) (Fig 3 G and H). Strain Sylvio X10/4 infection  
251 significantly decreased mid chain acylcarnitine at all positions (Mann-Whitney  $p < 0.05$ ) (Fig 3 E  
252 and F).

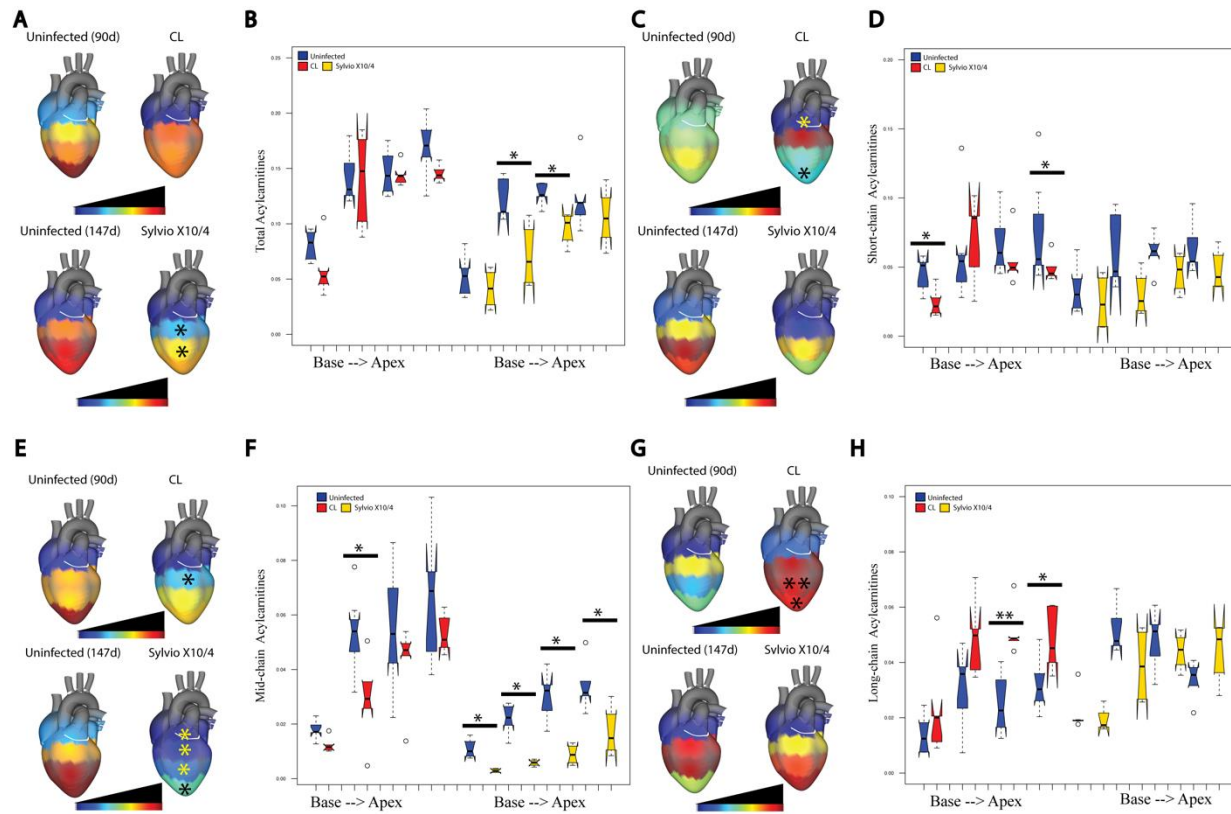

253

254 **Fig 3. Spatial impact of chronic *T. cruzi* infection on cardiac acylcarnitines.**

255 (A) and (B) Differential total acylcarnitine distribution between uninfected and infected heart  
 256 sections for both CL and Sylvio X10/4 strains. (\*,  $p < 0.05$  by Wilcoxon-Mann-Whitney). (C, D)  
 257 CL-infected mice showed statistically significant decreases (\*,  $p < 0.05$  by Mann-Whitney test) in  
 258 short-chain acylcarnitine ( $\leq C4$ ) at heart positions A and D. (E, F) Both strains of *T. cruzi*  
 259 showed statistically significant decreases in mid-chain acylcarnitines. (G, H) CL-infected mice  
 260 increased long-chain acylcarnitines ( $\geq C12$ ) at position C (\*\*,  $p < 0.01$ ) and D (\*,  $p < 0.05$ ).

261

262 CL strain infection significantly increased total phosphocholines at central position C  
 263 compared to uninfected samples (Mann-Whitney  $p < 0.01$ ), with a similar but non-significant  
 264 trend for strain Sylvio X10/4 infection at the heart apex (Fig 4 A and B). Further analysis based  
 265 on phosphocholine mass was performed, because previous studies showed differences in

266 phosphocholine mass range between fatal and non-fatal acute mouse infection [8].  
267 Phosphocholines were categorized into four mass ranges: short (200 - 400  $m/z$ ), mid (401 - 600  
268  $m/z$ ), long (601 - 800  $m/z$ ), and very long ( $>801 m/z$ ). Significantly elevated short  
269 phosphocholines were observed in central heart positions (position C) for Sylvio X10/4 infection  
270 compared to uninfected samples (Fig 4 C and D). This same pattern was also observed for CL  
271 strain infection in mid and very long phosphocholines at the same position ( $p < 0.01$  and  $< 0.05$ ,  
272 respectively), when compared to uninfected samples (Fig 4 E and F, I and J).



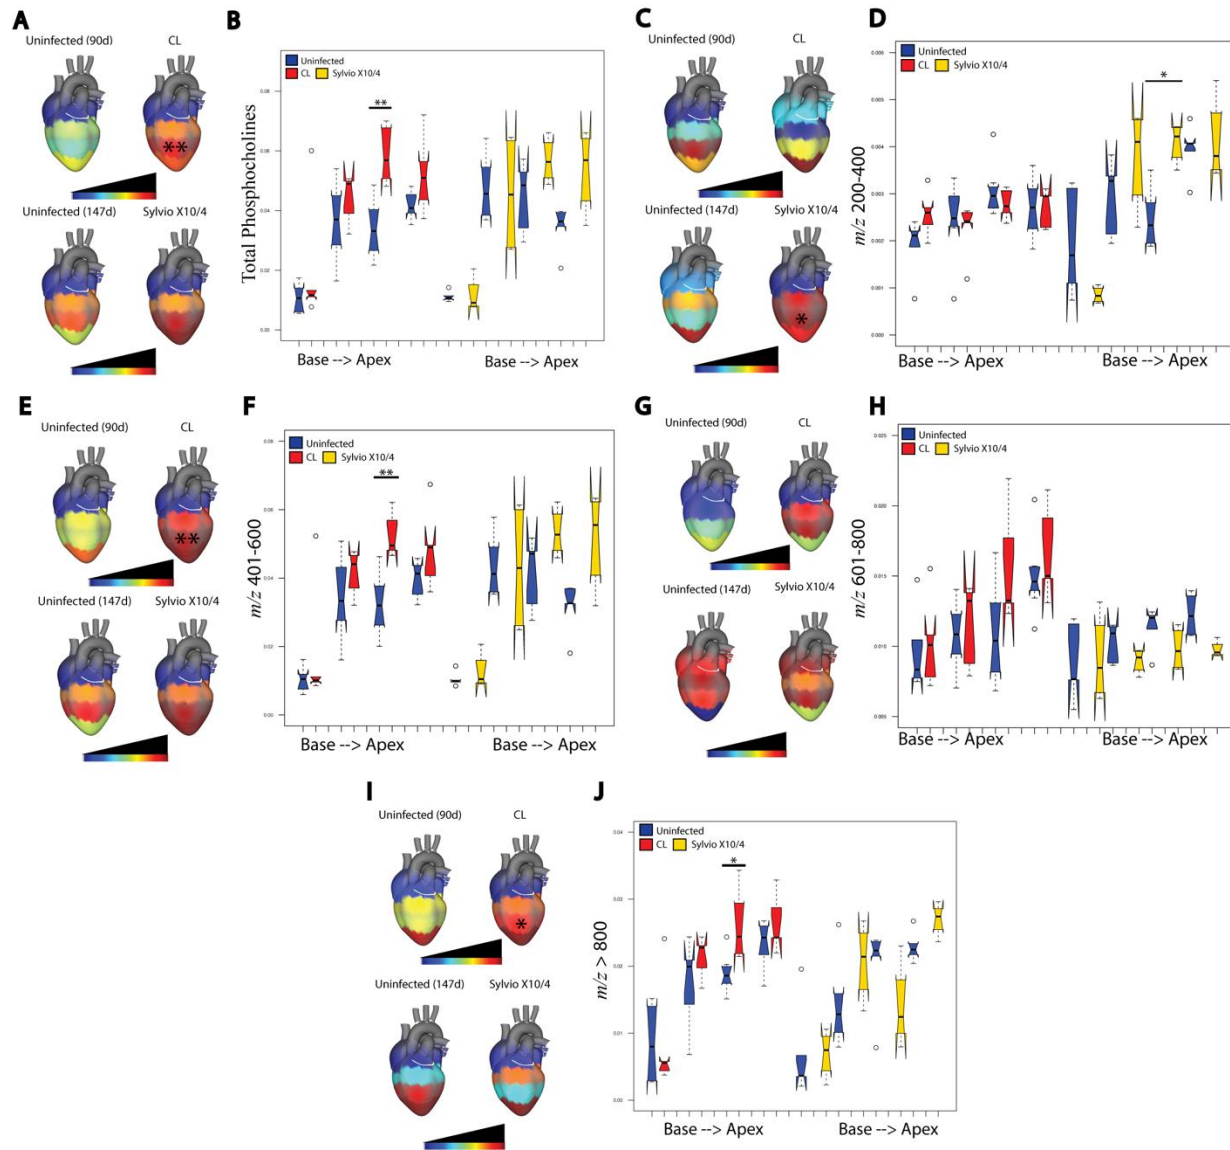

273

274 **Fig 4. Spatial impact of chronic *T. cruzi* infection on cardiac phosphocholines.**

275 (A, B) Statistically significant differences in total phosphocholine levels were identified in mice  
 276 infected with CL strain at heart position C when compared to uninfected mice (\*\*,  $p < 0.01$  by  
 277 Wilcoxon-Mann-Whitney test). (C,D) Sylvio X10/4-infected mice showed statistically  
 278 significant differences (\*,  $p < 0.05$  by Wilcoxon-Mann-Whitney test) in small phosphocholines  
 279 (200-400  $m/z$ ) at heart position C. (E, F) Only CL-infected mice showed statistically significant  
 280 differences (\*\*,  $p < 0.01$  by Wilcoxon-Mann-Whitney test) for mid-sized phosphocholines (401-

281 600 *m/z*) at position C. (G, H) Large phosphocholines (601-800 *m/z*) were not affected by  
282 infection for both strains. (I, J) CL-infected mice showed a statistically significant difference (\*,  
283  $p < 0.05$  by Wilcoxon-Mann-Whitney test) in very long phosphocholines ( $> 801$  *m/z*) at position  
284 C.

## 285 **Discussion**

286 Currently, there are 7 *T. cruzi* discrete typing units (DTUs TcI - TcVI and Tcbat). TcI to  
287 TcVI are infectious to humans [31]. These DTUs, while still currently considered the same  
288 species, nevertheless present significant genetic differences [31][32]. However, pathogenic  
289 processes are overall similar in cardiac CD across *T. cruzi* strains, with accumulation of fibrosis  
290 and inflammation, although timing and magnitude of symptoms may be different depending on  
291 parasite and host characteristics [32][33]. These similarities are reflected in the common  
292 metabolomic changes observed for strain Sylvio X10/4 (TcI) and strain CL (TcVI)-infected heart  
293 tissue in this study, including chronic infection-induced increases in phosphocholines and  
294 decreases in acylcarnitines.

295 Our results also highlight the importance of considering metabolic changes at the level of  
296 chemical families, beyond just individual metabolites. While there was little overlap of highly  
297 significant metabolite *m/z* at each position between strains, most differential metabolites were  
298 from these two chemical families. McCall *et al.* described these two chemical families as  
299 discriminatory compounds between fatal and non-fatal acute *T. cruzi* infected heart tissue [8].  
300 Considering acute stage infection progresses into chronic stage infection, it is not surprising that  
301 changes in the relative abundance of these molecules are also observed in chronic CD.  
302 Phosphocholines have been linked to coronary heart disease due to production of  
303 lysophosphatidylcholines and choline. [29,34]. Increased acylcarnitine levels have been linked to

304 cardiovascular disease as well as cardiac symptoms in those already possessing a cardiac disease  
305 [35,36]. However, our results show the opposite pattern compared to non-infectious heart  
306 disease, highlighting the need to specifically study CD rather than extrapolate from other cardiac  
307 conditions (Fig 3). In a study addressing gene expression differences between human CD  
308 cardiomyopathy and dilated cardiomyopathy, there was an upregulation of gene expression  
309 associated with lipid metabolism from heart samples of human cardiac CD patients, while the  
310 opposite was seen in non-infectious dilated cardiomyopathy patient samples [37]. Higher lipid  
311 metabolism would increase acylcarnitine catabolism and thus decrease overall acylcarnitine  
312 abundance. Decreased carnitine palmitoyltransferase and acetyltransferase levels, as observed by  
313 proteomic analysis of infected mouse heart tissue [38], may alternatively also contribute to the  
314 decreased acylcarnitine levels we observed.

315         Interestingly, in a study on the effects of diet on chronic *T. cruzi* mouse infection, a  
316 similar pattern was observed as in our study, where serum acylcarnitines were amongst the most  
317 differential compounds in infected samples compared to uninfected samples, with most short-  
318 and mid-chain acylcarnitines decreased, and select long-chain acylcarnitines increased [17]. In  
319 addition, significant acylcarnitine differences were seen in the gastrointestinal tract of acute *T.*  
320 *cruzi*-infected mice [18]. Likewise, both long chain acylcarnitines and phospholipid synthesis  
321 were increased in the heart tissue of acutely infected mice in prior studies [14]. Thus, our data  
322 agree with and expand upon the existing *T. cruzi* metabolomics literature. Overall, the different  
323 patterns in metabolites we observe here in contrast to other cardiac diseases is consistent with  
324 differences in gene expression in humans with CD compared to other diseases.

325         Differences in pathogenesis between strains may be due to differential strain tropism.  
326 Indeed, TcI strains tend to produce cardiomyopathy, while TcVI strains commonly produce

327 megacolon and megaesophagus, although cardiomyopathy can still occur [39]. Our results  
328 indicate a disconnect between sites of highest parasite burden and sites of metabolic perturbation.  
329 Although parasite levels were highest in central heart segments following strain Sylvio X10/4  
330 infection, we observed statistically significant perturbations in metabolism at the apex of the  
331 heart (Fig 1). Apical aneurysms are one of the major symptoms in chronic CD patients [40]. In  
332 addition, lateral heart wall damage is also common among chronic CD patients, in central  
333 regions of the heart [41], and we observed significant perturbations in cardiac metabolism at  
334 lower central heart positions in strain CL infection (Fig 1B) [41]. Based on these results, we  
335 propose a concept of spatial disease tolerance, whereby some tissue regions are more affected by  
336 infection, while others are less functionally affected. This is likely due to a combination of host  
337 and pathogen factors, given the differences we observe here between strain CL and strain Sylvio  
338 X10/4 infection in the same C3H mouse genetic background. Importantly, the localization of  
339 maximal metabolic perturbation in acute strain Sylvio X10/4 infection was also the heart apex,  
340 indicating that the spatial course of disease may be set early in CD [8]. Likewise, host factors  
341 likely contribute, such as the higher production of antiparasitic but tissue-damaging IFN $\gamma$  at the  
342 heart apex or specific cardiac regions being more prone to microvasculature disruptions [8].

343         These results set a foundation for biomarker studies and for host-directed therapeutic  
344 development. CD may be particularly amenable to such treatment strategies, due to the  
345 contribution of host-mediated tissue damage to CD pathogenesis [1,7]. Indeed, we have  
346 previously shown that carnitine supplementation can be used to treat acute CD [18]. Our  
347 observation of decreases in cardiac acylcarnitines in chronic CD indicate that this approach may  
348 also be useful to treat chronic CD. Importantly the fact that acylcarnitines are affected in both  
349 chronic CL and Sylvio X10/4 infection suggests broad applicability. Other studies have

350 emphasized the impact of metabolism modulators on CD progression. High fat diet reduces  
351 parasite levels and increases survival in acute CD mouse models [42]. Treatment of acutely *T.*  
352 *cruzi* infected mice with metformin (a metabolic modulator used to treat diabetic patients) also  
353 led to an increase in overall survival rate and decreased p blood parasitemia [43].

354 In addition to the need for novel treatments, several studies have highlighted the  
355 importance of novel diagnostic methods for CD [44,45]. Current diagnostic methods rely on  
356 serological and microscopic exams and polymerase chain reaction (PCR) [46]. In addition,  
357 during the chronic stage, parasite levels decrease drastically therefore PCR techniques have to be  
358 used instead of microscopy. PCR however only detects the presence of infection but not cardiac  
359 damage [46]. Hence, biomarkers in the form of small molecules or chemical families, as  
360 identified in this study, can aid in addressing this issue. Future work will investigate whether the  
361 infection-induced perturbations observed here in the heart are also detectable in clinically-  
362 accessible biofluids.

363 Due to the low parasite burden in chronic Chagas disease and instrumental limits of  
364 detection, we anticipate most if not all detected metabolites to be host-derived, supported by their  
365 detection in uninfected tissues. As such, this study is focused on the impact of *T. cruzi* infection  
366 on host metabolism. A further limitation is that many of the differential metabolites were not  
367 annotatable, as is usual in metabolomic studies [47]. Nevertheless, we were able to annotate  
368 metabolites affected by chronic infection that make up important host biochemical pathways.

369 Overall, our study highlights the importance of not only identifying overall differences  
370 but also positional metabolic differences associated with multiple *T. cruzi* strains, and the  
371 strength of systematic chemical cartography in understanding disease tropism and how it differs

372 from pathogen tropism. These results will serve as stepping stones for further CD drug  
373 development and biomarker discovery, something that is urgently needed.

### 374 **Financial disclosure**

375 Initial sample collection was supported by a postdoctoral fellowship from the Canadian  
376 Institutes of Health Research, award number 338511 to LIM ([www.cihr-irsc.gc.ca/](http://www.cihr-irsc.gc.ca/)). Work in the  
377 McCall laboratory at the University of Oklahoma is supported by start-up funds from the  
378 University of Oklahoma (<http://www.ou.edu/>). This work was also partially supported by the US  
379 National Institutes of Health (NIH) grant 5P41GM103484-07 to PCD and R21AI148886 to LIM  
380 ([www.nih.gov/](http://www.nih.gov/)). We further acknowledge NIH Grant GMS10RR029121 ([www.nih.gov/](http://www.nih.gov/)) and  
381 Bruker ([www.bruker.com/](http://www.bruker.com/)) for the shared instrumentation infrastructure that enabled this work at  
382 UCSD. The funders had no role in study design, data collection and analysis, decision to publish,  
383 or preparation of the manuscript.

## 384 **References**

- 385 1. Rassi A Jr, Rassi A, Marin-Neto JA. Chagas disease. *Lancet*. 2010;375: 1388–1402.
- 386 2. Bern C. Chagas' Disease. *The New England journal of medicine*. 2015. p. 1882.
- 387 3. Beatty NL, Perez-Velez CM, Yaglom HD, Carson S, Liu E, Khalpey ZI, et al. Evidence of Likely  
388 Autochthonous Transmission of Chagas Disease in Arizona. *Am J Trop Med Hyg*. 2018;99: 1534–  
389 1536.
- 390 4. Gunter SM, Murray KO, Gorchakov R, Beddard R, Rossmann SN, Montgomery SP, et al. Likely  
391 Autochthonous Transmission of *Trypanosoma cruzi* to Humans, South Central Texas, USA. *Emerg*  
392 *Infect Dis*. 2017;23: 500–503.
- 393 5. Miller DA, Hernandez S, De Armas LR, Eells SJ, Traina MM, Miller LG, et al. Tolerance of  
394 Benznidazole in a United States Chagas Disease Clinic. *Clinical Infectious Diseases*. 2015. pp.  
395 1237–1240. doi:10.1093/cid/civ005
- 396 6. Forsyth CJ, Hernandez S, Olmedo W, Abuhamidah A, Traina MI, Sanchez DR, et al. Safety Profile  
397 of Nifurtimox for Treatment of Chagas Disease in the United States. *Clin Infect Dis*. 2016;63: 1056–  
398 1062.
- 399 7. Tarleton RL. Chagas disease: a role for autoimmunity? *Trends in Parasitology*. 2003. pp. 447–451.  
400 doi:10.1016/j.pt.2003.08.008
- 401 8. McCall L-I, Morton JT, Bernatchez JA, de Siqueira-Neto JL, Knight R, Dorrestein PC, et al. Mass  
402 Spectrometry-Based Chemical Cartography of a Cardiac Parasitic Infection. *Anal Chem*. 2017;89:  
403 10414–10421.
- 404 9. Lewis MD, Kelly JM. Putting Infection Dynamics at the Heart of Chagas Disease. *Trends Parasitol*.

- 405           2016;32: 899–911.
- 406   10. McCall L-I, McKerrow JH. Determinants of disease phenotype in trypanosomatid parasites. Trends  
407           Parasitol. 2014;30: 342–349.
- 408   11. Breitling R, Bakker BM, Barrett MP, Decuypere S, Dujardin J-C. Metabolomic Systems Biology of  
409           Protozoan Parasites. Genetics Meets Metabolomics. 2012. pp. 73–84. doi:10.1007/978-1-4614-1689-  
410           0\_6
- 411   12. Caradonna KL, Engel JC, Jacobi D, Lee C-H, Burleigh BA. Host metabolism regulates intracellular  
412           growth of *Trypanosoma cruzi*. Cell Host Microbe. 2013;13: 108–117.
- 413   13. Cestari I, Haas P, Moretti NS, Schenkman S, Stuart K. Chemogenetic Characterization of Inositol  
414           Phosphate Metabolic Pathway Reveals Druggable Enzymes for Targeting Kinetoplastid Parasites.  
415           Cell Chem Biol. 2016;23: 608–617.
- 416   14. Gironès N, Carbajosa S, Guerrero NA, Poveda C, Chillón-Marinas C, Fresno M. Global  
417           metabolomic profiling of acute myocarditis caused by *Trypanosoma cruzi* infection. PLoS Negl Trop  
418           Dis. 2014;8: e3337.
- 419   15. Knubel CP, Martínez FF, Acosta Rodríguez EV, Altamirano A, Rivarola HW, Diaz Luján C, et al. 3-  
420           Hydroxy kynurenine treatment controls *T. cruzi* replication and the inflammatory pathology  
421           preventing the clinical symptoms of chronic Chagas disease. PLoS One. 2011;6: e26550.
- 422   16. Garg N, Gerstner A, Bhatia V, DeFord J, Papaconstantinou J. Gene expression analysis in  
423           mitochondria from chagasic mice: alterations in specific metabolic pathways. Biochem J. 2004;381:  
424           743–752.
- 425   17. Lizardo K, Ayyappan JP, Ganapathi U, Dutra WO, Qiu Y, Weiss LM, et al. Diet Alters Serum  
426           Metabolomic Profiling in the Mouse Model of Chronic Chagas Cardiomyopathy. Dis Markers.



- 427           2019;2019: 4956016.
- 428   18. Hossain E, Khanam S, Wu C, Lostracco-Johnson S, Thomas D, Katemauswa M, et al. 3D mapping  
429           of host-parasite-microbiome interactions reveals metabolic determinants of tissue tropism and  
430           disease tolerance in Chagas disease. doi:10.1101/727917
- 431   19. Jr AR, Rassi A Jr, Rassi A, Little WC. Chagas' Heart Disease. *Clinical Cardiology*. 2000. pp. 883–  
432           889. doi:10.1002/clc.4960231205
- 433   20. Acquatella H. Echocardiography in Chagas heart disease. *Circulation*. 2007;115: 1124–1131.
- 434   21. Want EJ, Masson P, Michopoulos F, Wilson ID, Theodoridis G, Plumb RS, et al. Global metabolic  
435           profiling of animal and human tissues via UPLC-MS. *Nat Protoc*. 2013;8: 17–32.
- 436   22. Sturm M, Bertsch A, Gröpl C, Hildebrandt A, Hussong R, Lange E, et al. OpenMS - an open-source  
437           software framework for mass spectrometry. *BMC Bioinformatics*. 2008;9: 163.
- 438   23. Caporaso JG, Kuczynski J, Stombaugh J, Bittinger K, Bushman FD, Costello EK, et al. QIIME  
439           allows analysis of high-throughput community sequencing data. *Nat Methods*. 2010;7: 335–336.
- 440   24. Vázquez-Baeza Y, Pirrung M, Gonzalez A, Knight R. EMPeror: a tool for visualizing high-  
441           throughput microbial community data. *Gigascience*. 2013;2: 16.
- 442   25. Protsyuk I, Melnik AV, Nothias L-F, Rappé L, Phapale P, Aksenov AA, et al. 3D molecular  
443           cartography using LC-MS facilitated by Optimus and 'ili software. *Nat Protoc*. 2018;13: 134–154.
- 444   26. Wang M, Carver JJ, Phelan VV, Sanchez LM, Garg N, Peng Y, et al. Sharing and community  
445           curation of mass spectrometry data with Global Natural Products Social Molecular Networking. *Nat*  
446           *Biotechnol*. 2016;34: 828–837.
- 447   27. Shannon P, Markiel A, Ozier O, Baliga NS, Wang JT, Ramage D, et al. Cytoscape: a software

- 448 environment for integrated models of biomolecular interaction networks. *Genome Res.* 2003;13:  
449 2498–2504.
- 450 28. Longo N, Frigeni M, Pasquali M. Carnitine transport and fatty acid oxidation. *Biochim Biophys*  
451 *Acta.* 2016;1863: 2422–2435.
- 452 29. Tang WHW, Wilson Tang WH, Wang Z, Levison BS, Koeth RA, Britt EB, et al. Intestinal Microbial  
453 Metabolism of Phosphatidylcholine and Cardiovascular Risk. *New England Journal of Medicine.*  
454 2013. pp. 1575–1584. doi:10.1056/nejmoa1109400
- 455 30. van der Veen JN, Kennelly JP, Wan S, Vance JE, Vance DE, Jacobs RL. The critical role of  
456 phosphatidylcholine and phosphatidylethanolamine metabolism in health and disease. *Biochim*  
457 *Biophys Acta Biomembr.* 2017;1859: 1558–1572.
- 458 31. Brenière SF, Waleckx E, Barnabé C. Over Six Thousand *Trypanosoma cruzi* Strains Classified into  
459 Discrete Typing Units (DTUs): Attempt at an Inventory. *PLoS Negl Trop Dis.* 2016;10: e0004792.
- 460 32. Dorn PL, McClure AG, Gallaspy MD, Waleckx E, Woods AS, Monroy MC, et al. The diversity of  
461 the Chagas parasite, *Trypanosoma cruzi*, infecting the main Central American vector, *Triatoma*  
462 *dimidiata*, from Mexico to Colombia. *PLoS Negl Trop Dis.* 2017;11: e0005878.
- 463 33. Messenger LA, Miles MA, Bern C. Between a bug and a hard place: *Trypanosoma cruzi* genetic  
464 diversity and the clinical outcomes of Chagas disease. *Expert Rev Anti Infect Ther.* 2015;13: 995–  
465 1029.
- 466 34. Ganna A, Salihovic S, Sundström J, Broeckling CD, Hedman AK, Magnusson PKE, et al. Large-  
467 scale metabolomic profiling identifies novel biomarkers for incident coronary heart disease. *PLoS*  
468 *Genet.* 2014;10: e1004801.
- 469 35. Guasch-Ferré M, Zheng Y, Ruiz-Canela M, Hruby A, Martínez-González MA, Clish CB, et al.

- 470 Plasma acylcarnitines and risk of cardiovascular disease: effect of Mediterranean diet interventions.  
471 Am J Clin Nutr. 2016;103: 1408–1416.
- 472 36. Strand E, Pedersen ER, Svingen GFT, Olsen T, Bjørndal B, Karlsson T, et al. Serum Acylcarnitines  
473 and Risk of Cardiovascular Death and Acute Myocardial Infarction in Patients With Stable Angina  
474 Pectoris. J Am Heart Assoc. 2017;6. doi:10.1161/JAHA.116.003620
- 475 37. Cunha-Neto E, Dzau VJ, Allen PD, Stamatou D, Benvenuti L, Higuchi ML, et al. Cardiac gene  
476 expression profiling provides evidence for cytokinopathy as a molecular mechanism in Chagas'  
477 disease cardiomyopathy. Am J Pathol. 2005;167: 305–313.
- 478 38. Wozniak JM, Silva TA, Thomas D, Siqueira-Neto JL, McKerrow JH, Gonzalez DJ, et al. Molecular  
479 dissection of chagas induced cardiomyopathy reveals central disease associated and druggable  
480 signaling pathways. PLoS Negl Trop Dis. 2020;14: e0007980.
- 481 39. Ramos-Ligonio A, Torres-Montero J, López-Monteón A, Dumonteil E. Extensive diversity of  
482 Trypanosoma cruzi discrete typing units circulating in Triatoma dimidiata from central Veracruz,  
483 Mexico. Infection, Genetics and Evolution. 2012. pp. 1341–1343. doi:10.1016/j.meegid.2012.04.024
- 484 40. Marin-Neto JA, Cunha-Neto E, Maciel BC, Simões MV. Pathogenesis of chronic Chagas heart  
485 disease. Circulation. 2007;115: 1109–1123.
- 486 41. Lee-Felker SA, Thomas M, Felker ER, Traina M, Salih M, Hernandez S, et al. Value of cardiac MRI  
487 for evaluation of chronic Chagas disease cardiomyopathy. Clin Radiol. 2016;71: 618.e1–7.
- 488 42. Harris EV, de Roode JC, Gerardo NM. Diet–microbiome–disease: Investigating diet's influence on  
489 infectious disease resistance through alteration of the gut microbiome. PLOS Pathogens. 2019. p.  
490 e1007891. doi:10.1371/journal.ppat.1007891
- 491 43. Brima W, Eden DJ, Mehdi SF, Bravo M, Wiese MM, Stein J, et al. The brighter (and evolutionarily

- 492 older) face of the metabolic syndrome: evidence from *Trypanosoma cruzi* infection in CD-1 mice.  
493 *Diabetes Metab Res Rev.* 2015;31: 346–359.
- 494 44. Alonso-Padilla J, Cortés-Serra N, Pinazo MJ, Bottazzi ME, Abril M, Barreira F, et al. Strategies to  
495 enhance access to diagnosis and treatment for Chagas disease patients in Latin America. *Expert Rev*  
496 *Anti Infect Ther.* 2019;17: 145–157.
- 497 45. Picado A, Angheben A, Marchiol A, Alarcón de Noya B, Flevaud L, Pinazo MJ, et al. Development  
498 of Diagnostics for Chagas Disease: Where Should We Put Our Limited Resources? *PLoS Negl Trop*  
499 *Dis.* 2017;11: e0005148.
- 500 46. Keating SM, Deng X, Fernandes F, Cunha-Neto E, Ribeiro AL, Adesina B, et al. Inflammatory and  
501 cardiac biomarkers are differentially expressed in clinical stages of Chagas disease. *Int J Cardiol.*  
502 2015;199: 451–459.
- 503 47. da Silva RR, Dorrestein PC, Quinn RA. Illuminating the dark matter in metabolomics. *Proceedings*  
504 *of the National Academy of Sciences of the United States of America.* 2015. pp. 12549–12550.

505 **Supporting information**

506 **S1 Table. Annotated metabolites of combined extracts perturbed by infection at**  
507 **position A, identified through random forest classifier.**

508 **S2 Table. Annotated metabolites of combined extracts perturbed by infection at**  
509 **position B, identified through random forest classifier.**

510 **S3 Table. Annotated metabolites of combined extracts perturbed by infection at**  
511 **position C, identified through random forest classifier.**

512 **S4 Table. Annotated metabolites of combined extracts perturbed by infection at**  
513 **position D, identified through random forest classifier.**

514 **S5 Table. Annotated metabolites of combined extracts perturbed by infection at**  
515 **positions A-D, identified through random forest classifier.**

516 **S6 Table. Annotated metabolites of combined extracts identified as perturbed by**  
517 **infection at all positions (FDR-corrected Mann Whitney  $p < 0.05$ ).**

518 **S1 Figure. Principal coordinate analysis plot of *T. cruzi* strain CL infected (red) and**  
519 **uninfected (blue) heart tissue samples. Statistically different clustering found in position C**  
520 **(PERMANOVA  $p$ -value $<0.05$ ).**

521 **S2 Figure. Principal coordinate analysis plot of *T. cruzi* strain Sylvio X10/4 infected**  
522 **(gold) and uninfected (blue) heart tissue samples. Statistically different clustering found in**  
523 **position D (PERMANOVA  $p$ -value $<0.05$ ).**

524           **S3 Figure. Sub-molecular networks and mirror plot of aqueous and organic extract**  
525 **acylcarnitines and phosphocholines.** Each pie chart is one metabolite colored by MS2 spectral  
526 count in CL-infected and Sylvio X10/4-infected samples where red is CL and gold is Sylvio  
527 X10/4. (A) Subnetwork of aqueous extract acylcarnitines with representative acylcarnitine mirror  
528 plot (acetylcarnitine,  $m/z$  -204.124). (B) Subnetwork of aqueous extract phosphocholines with  
529 representative phosphocholine mirror plot (Spectral match to 1-Hexadecanoyl-2-(9Z-  
530 octadecenoyl)-sn-glycero-3-phosphocholine,  $m/z$  758.65). (C) Subnetwork of organic extract  
531 acylcarnitines with representative acylcarnitine mirror plot (acetylcarnitine,  $m/z$ - 204.126 ). (D)  
532 Subnetwork of organic extract phosphocholines with representative phosphocholine mirror plot  
533 (Spectral Match to 1-Oleoyl-2-palmitoyl-sn-glycero-3-phosphocholine,  $m/z$  -760.601).

534           **S4 Figure. GNPS mirror plots of annotated metabolites.** (A) mirror plot of  $m/z$   
535 703.575, RT 286s (top, black) to reference library spectrum (SM(d18:1/16:0), bottom, green).  
536 (B) mirror plot of  $m/z$  454.294, RT 206s (top, black) to reference library spectrum  
537 (hexadecanoyl-lysophosphatidylethanolamine, bottom, green). (C) mirror plot of  $m/z$  377.146,  
538 RT 137s (top, black) to reference library spectrum (riboflavin, bottom, green). (D) mirror plot of  
539  $m/z$  646.614, RT 417s (top, black) to reference library spectrum (ceramide, bottom, green). (E)  
540 mirror plot of  $m/z$  716.523, RT 395s (top, black) to reference library spectrum (1-palmitoyl-2-  
541 oleoyl-sn-glycero-3-phosphoethanolamine, bottom, green).
